# Supplementary material for: Precipitation of aqueous transition metals in particulate matter during the dithiothreitol (DTT) oxidative potential assay
Source: Royal Society of Chemistry journal article supplement (doi:10.1039/d2em00005a), 2022-01-01
Supplement: d2em00005a1.pdf [file d2em00005a1.pdf]

Supporting Information for:

**Precipitation of aqueous transition metals in particulate matter during the  
dithiothreitol (DTT) oxidative potential assay**

*Jayashree Yalamanchili, Christopher J. Hennigan\*, Brian E. Reed\**

Department of Chemical, Biochemical and Environmental Engineering, University of Maryland,  
Baltimore County, 1000 Hilltop Circle, Baltimore, Maryland 21250, United States.

To whom correspondence should be addressed: C.J. Hennigan. Email: [hennigan@umbc.edu](mailto:hennigan@umbc.edu);  
phone: (410) 455-3515. B.E. Reed. Email: [reedb@umbc.edu](mailto:reedb@umbc.edu); phone: (410) 455-8154.

Contents of this file:

Pages: 43

Figures S1/S7

Tables S1/S9

List of figures:

S1. Calibration curves for (a) Fe (b) Mn and (c) Cu comparing the prepared concentration to the measured concentrations using both ICP-MS and colorimetric analysis.

S2. Particle number concentration of polystyrene latex beads in DI water as a function of the laser obscuration measured using the laser particle light scattering analysis.

S3. Effect of  $K_{S0}$  on saturation index for Al, Ca, Fe(III), Mn and Pb precipitation.

S4. Effect of the mixing speed on Fe removal in SRM-1648a extract samples 1,2 and 3.

S5. TEM images for SRM-1648a samples 1,2 and 3 in the DTT assay.

S6. SEM images for SRM-1648a samples 2 and 3 in the DTT assay.

S7. Particle number concentration for each of the individual metal-salt experiments of (a) Fe(III), (b) Fe(II) and (c) Mn(II) in the DTT assay.

List of tables:

S1. Certified Mass Fraction Values (Dry-Mass Basis) of all elements present in NIST Urban Particulate matter SRM-1648a as given in the NIST database.

S2. Comparison of colorimetric and ICP-MS measurements for Fe, Cu, and Mn for an SRM1648a extract

S3. Slope, intercept, and R-square for colorimetric method calibration for Fe in the DI water and 0.1M phosphate buffer matrix.

S4. Slope, intercept, and R-square for colorimetric method calibration for Mn in the DI water and 0.1M phosphate buffer matrix.

S5. Slope, intercept, and R-square for colorimetric method calibration for Cu in the DI water and 0.1M phosphate buffer matrix.

S6. Method Detection limit for the colorimetric analysis in DI water and 0.1M phosphate buffer matrices.

S7. Thermodynamic data for the metals in their aqueous phase complexes and solid forms at 25°C. (a) Cu(I) (b) Cu(II) (c) Fe(III) (d) Fe(II) (e) Mn(II), Mn(III), and Mn(IV) (f) Ni(II) (g) Zn(II) (h) Cr(III) (i) Cr(VI) (j) Co(II) (k) Co(III) (l) V(III) (m) Al(III) (n) Ca(II) (o) Mg(II) (p)Mo(II) (q) Pb(II)

S8. Solubilities of various precipitates for each metal under assay conditions (0.1M PO<sub>4</sub>, ionic strength=0.22, 37C, fixed solids).

S9. Saturation index of various precipitates for each metal under assay conditions (0.1M PO<sub>4</sub>, ionic strength=0.22, 37C).

(a)

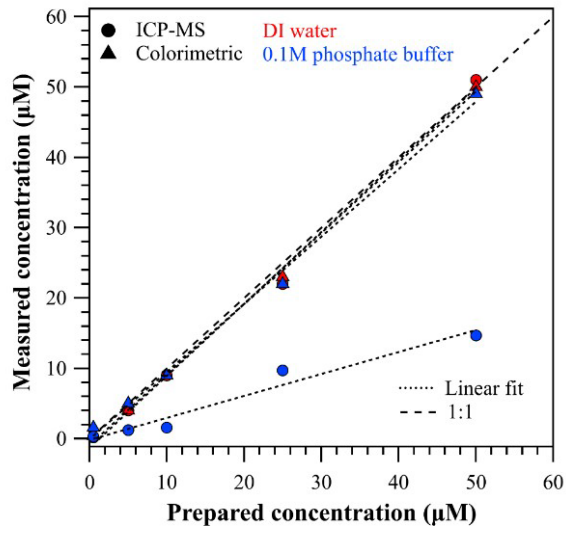

(b)

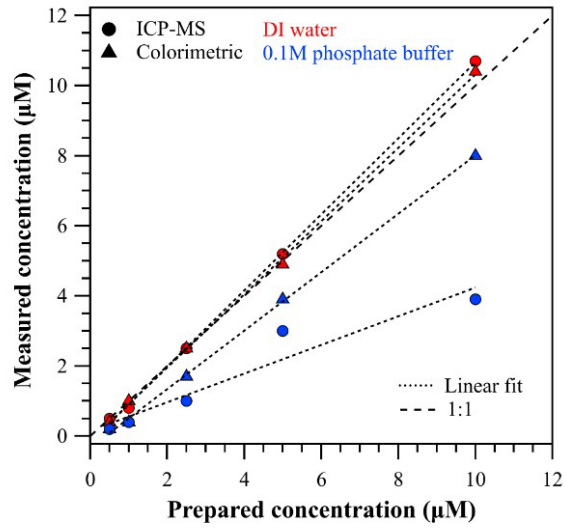

(c)

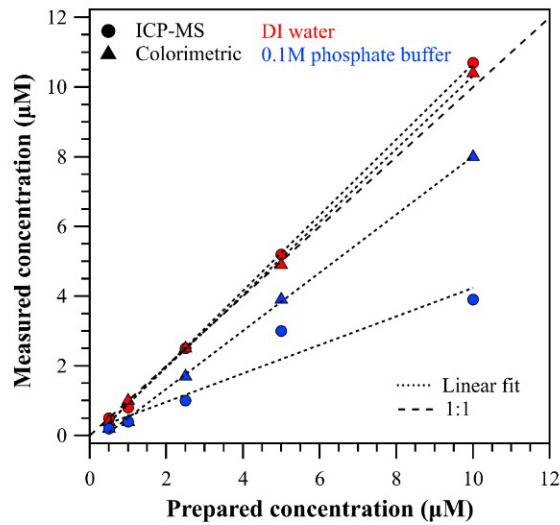

**Figure S1.** Calibration curves for (a) Fe (b) Mn and (c) Cu comparing the prepared concentration to the measured concentrations using both ICP-MS and colorimetric analysis. Calibration curves for each of the metals were measured in DI water (red data points) and 0.1 M phosphate buffer (blue data points). Colorimetric Fe analysis was not affected by the presence of phosphate; however, the response of Mn and Cu decreased slightly in 0.1M phosphate buffer matrix compared to their measurement in DI water. Calibration curves for Mn and Cu in 0.1M phosphate buffer matrix were used for their colorimetric measurements in the DTT assay. The figures of merit for the calibration curves are given in Table S3-S5. The method detection limits for the colorimetric analyses are in Table S6.

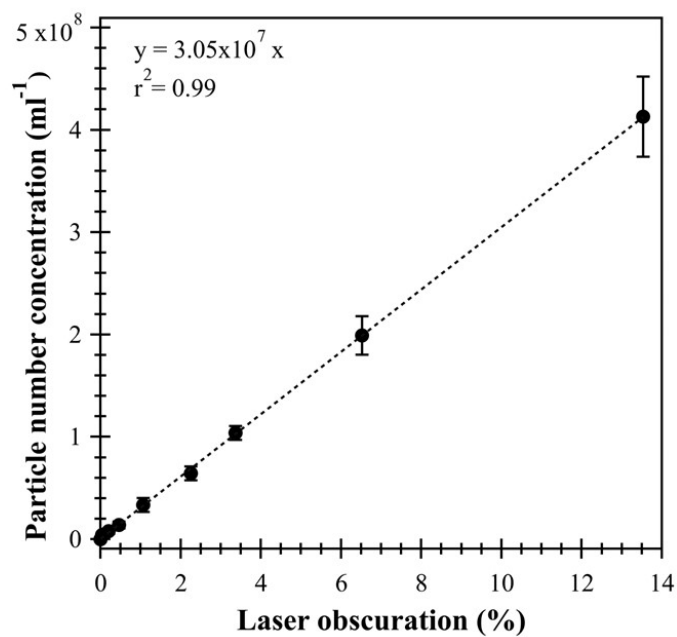

**Figure S2.** Particle number concentration of PSL in DI water as a function of the laser obscuration measured using the laser particle light scattering analysis. The particle light scattering measurements were limited to quantifying the particle number concentration because particle mass concentration measurements require knowledge of the precipitate identity and optical properties (i.e., refractive index). The detection limit was  $3.97 \times 10^6 \text{ ml}^{-1}$ .

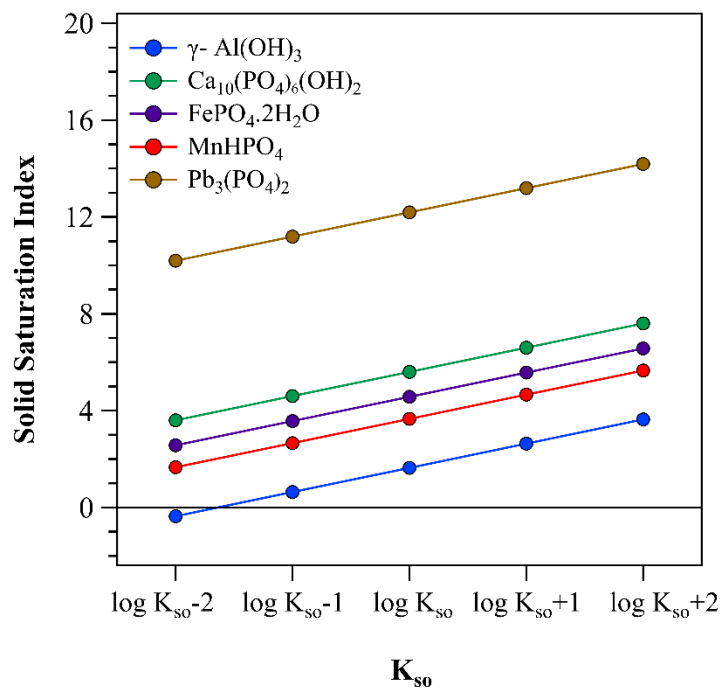

**Figure S3.** Effect of  $K_{so}$  on saturation index for Al, Ca, Fe(III), Mn and Pb precipitation for SRM-1648a sample 3 at the assay conditions (0.1 M phosphate buffer, pH 7.4, 37 °C). Note that saturation index (SI) =  $\log(\text{ion activity product}/\text{solubility product})$ . A positive value of SI indicates that precipitation is thermodynamically possible.

(a)

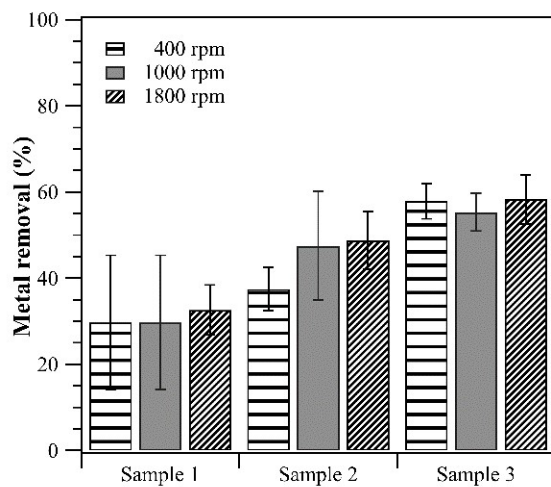

(b)

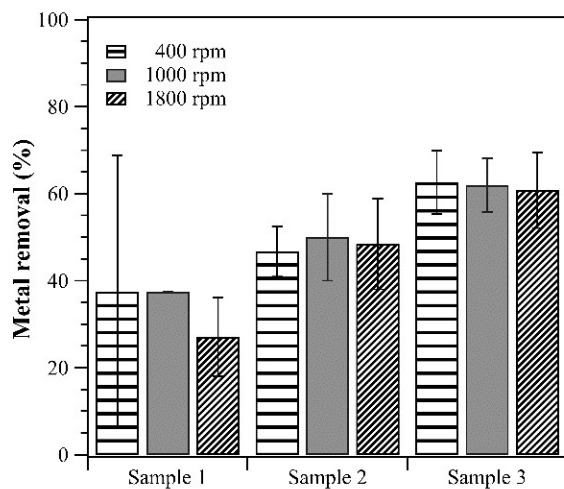

**Figure S4.** Effect of the mixing speed on Fe removal in SRM-1648a extract samples 1, 2, and 3 during the (a) presence and (b) absence of DTT under the assay conditions (0.1 M phosphate buffer, pH 7.4,  $37 \pm 3$  °C) for 30 minutes. The mixing speed did not have any effect on the extent of Fe removal.



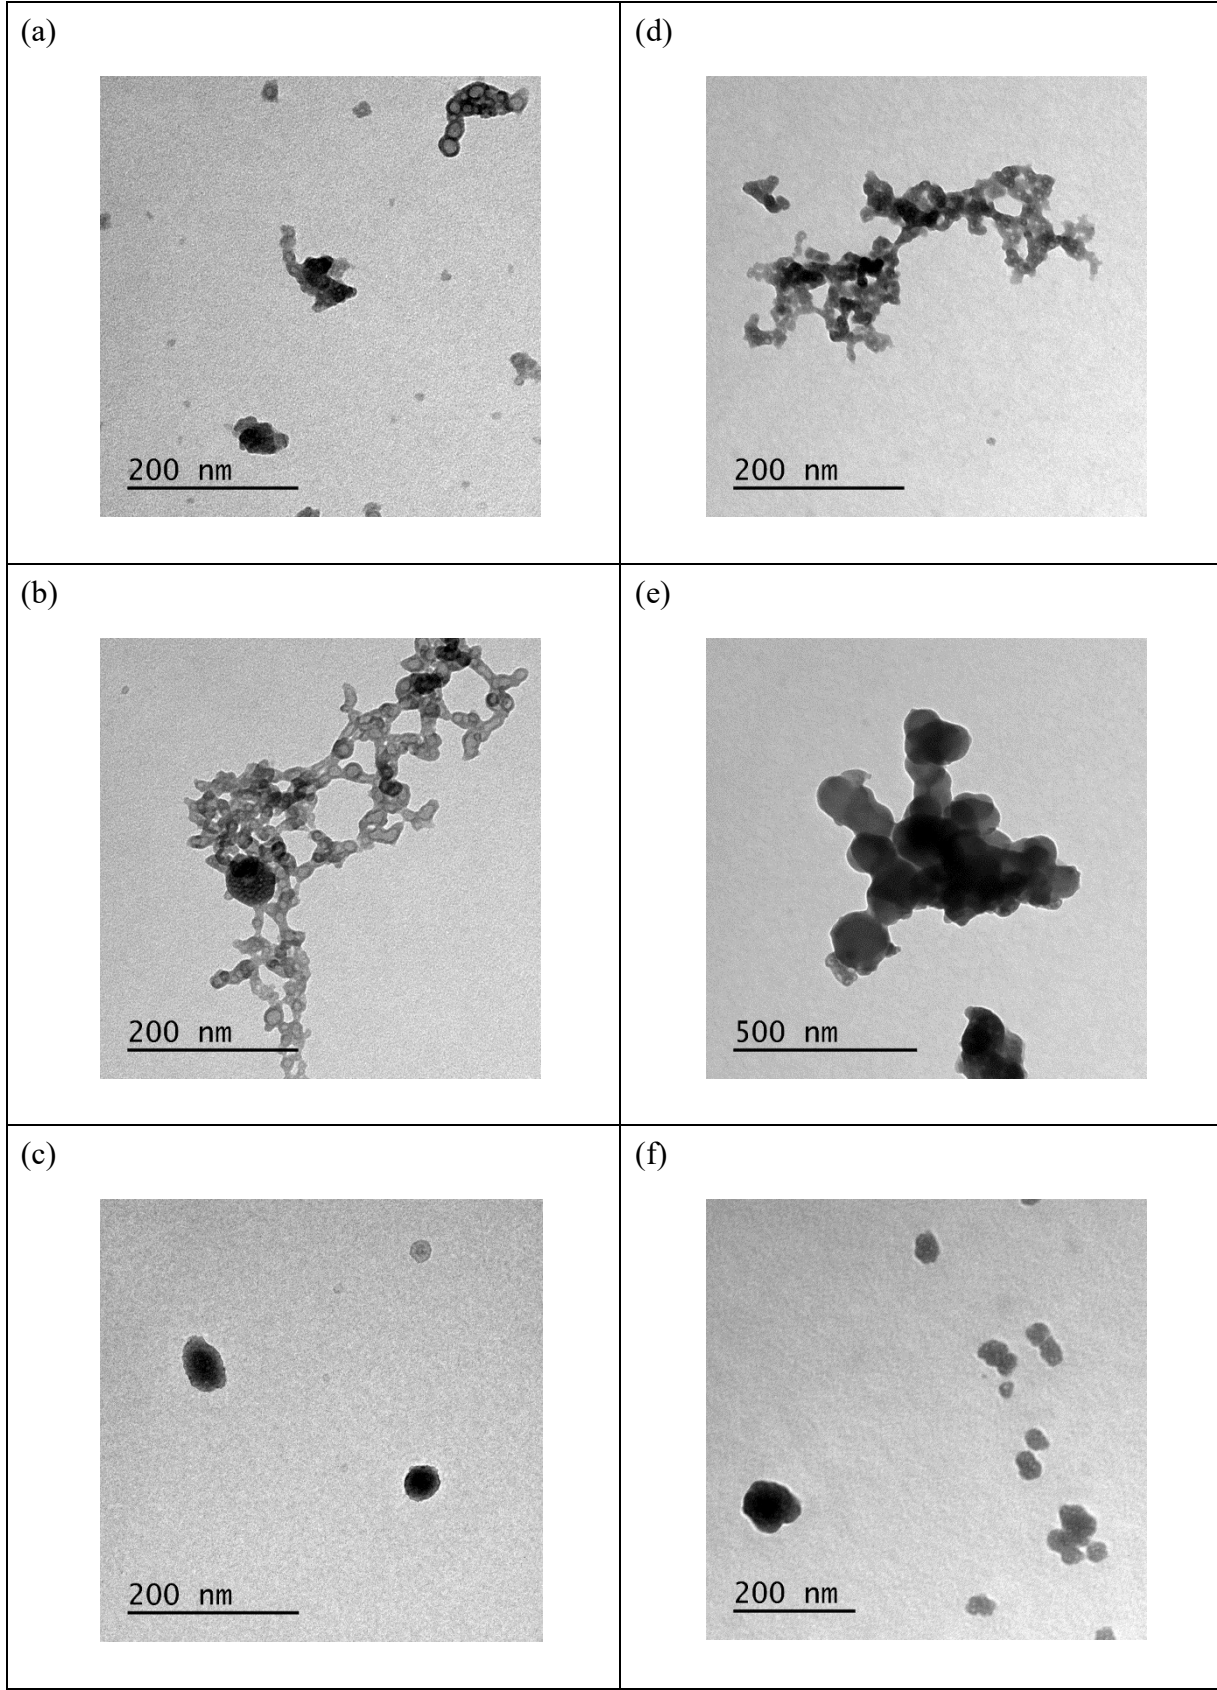

**Figure S5.** Solids of size ~200- 500nm are identified by the TEM images of the SRM1648a extract samples filtered after 30 minutes in the DTT assay (0.1M phosphate buffer, pH 7.4,  $37 \pm 3$  °C) for (a) sample 1 (b) sample 2 and (c) sample 3 in the presence of DTT, (d) sample 1, (e) sample 2 and (f) sample 3 in the absence of DTT.

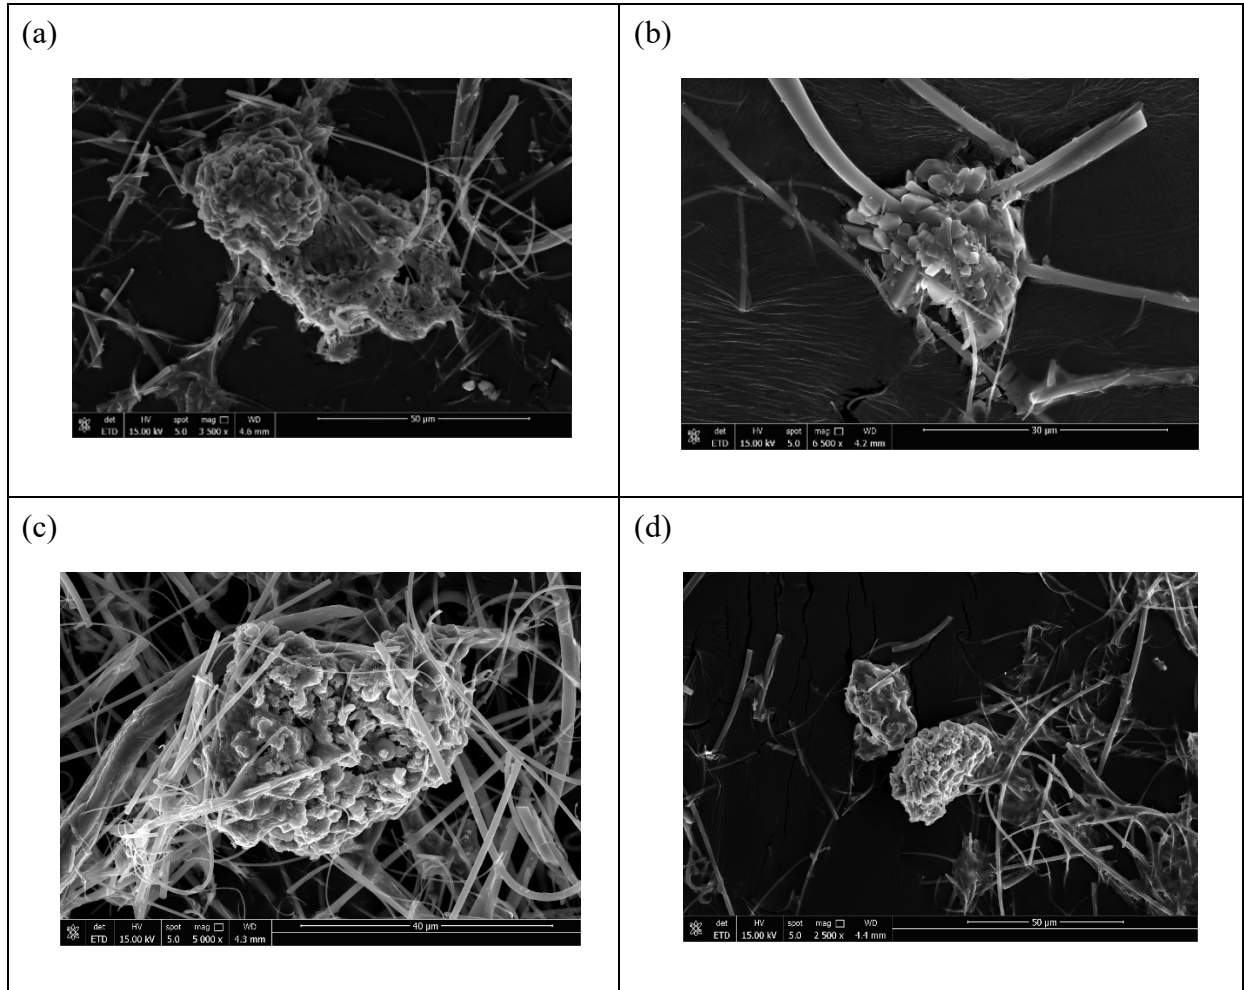

**Figure S6.** SEM images of the SRM-1648a extract samples filtered after 30 minutes in the DTT assay (0.1M phosphate buffer, pH 7.4,  $37 \pm 3$  °C) for (a) sample 2 in the absence of DTT, (b) sample 2 in the presence of DTT, (c) sample 3 in the absence of DTT (d) sample 3 in the presence of DTT shows solid clusters that were used for EDS analysis.

(a)

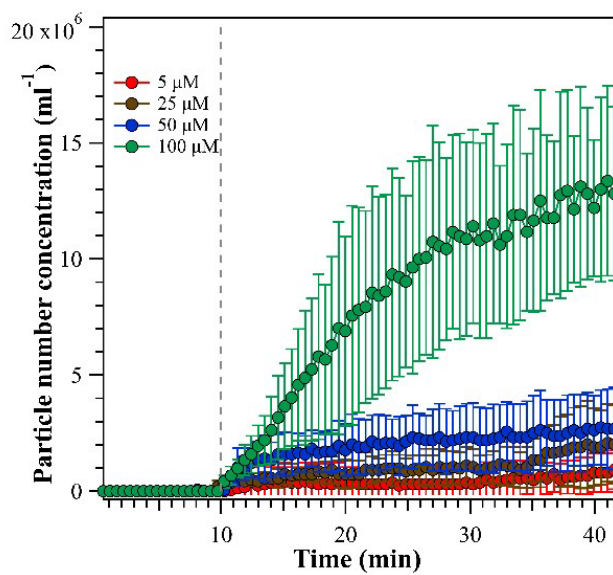

(b)

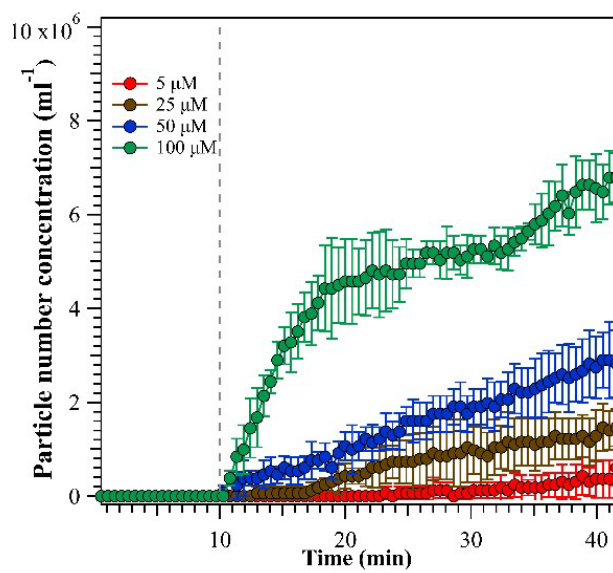

(c)

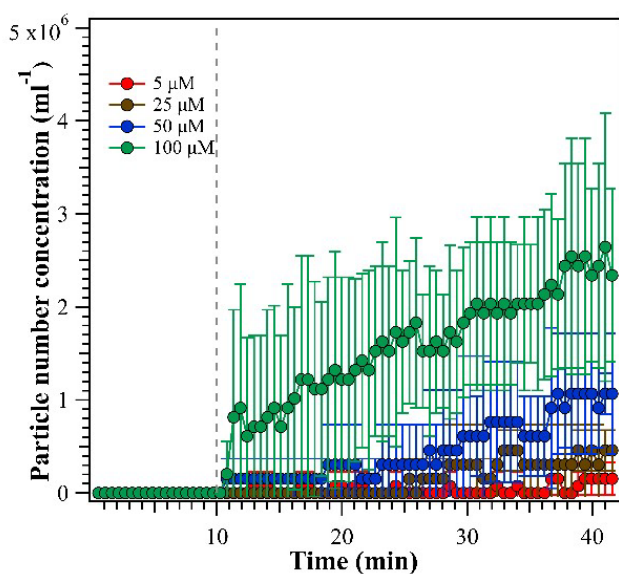

**Figure S7.** Particle number concentration for each of the individual metal-salt experiments of (a) Fe(III), (b) Fe(II) and (c) Mn(II) in the DTT assay (0.1M phosphate buffer, pH 7.4 and  $37 \pm 3$  °C) measured in Figure 4(a) as a function of the initial metal concentration. Symbols represent the mean values and error bars represent the standard deviation of measurements performed in triplicate.

**Table S1.** Certified Mass Fraction Values (Dry-Mass Basis) of all elements present in NIST Urban Particulate matter SRM-1648a as given in the NIST database.

| Element               | Mass fraction (% or mg/kg) |
|-----------------------|----------------------------|
| Aluminum (Al)(a,b)    | 3.43 ± 0.13 %              |
| Antimony (Sb)(a,c)    | 45.4 ± 1.4 mg/kg           |
| Arsenic (As)(a,c,d,e) | 115.5 ± 3.9 mg/kg          |
| Bromine (Br)(a,b,e)   | 502 ± 10 mg/kg             |
| Calcium (Ca)(a,b,c,e) | 5.84 ± 0.19 %              |
| Cadmium (Cd)(d,f)     | 73.7 ± 2.3 mg/kg           |
| Cerium (Ce)(a,c)      | 54.6 ± 2.2 mg/kg           |
| Chlorine (Cl)(a,b)    | 4543 ± 47 mg/kg            |
| Cobalt (Co)(a,c)      | 17.93 ± 0.68 mg/kg         |
| Chromium (Cr)(a,b)    | 402 ± 13 mg/kg             |
| Copper (Cu)(a,d,e)    | 610 ± 70 mg/kg             |
| Iron (Fe)(a,b,e,f)    | 3.92 ± 0.21 %              |
| Lead (Pb)(b,c,d,e)    | 0.655 ± 0.033 %            |
| Magnesium (Mg)(a,b)   | 0.813 ± 0.012 %            |
| Manganese (Mn)(a,b,e) | 790 ± 44 mg/kg             |
| Mercury (Hg)(g)       | 1.323 ± 0.064 mg/kg        |
| Nickel (Ni)(b,c,d,e)  | 81.1 ± 6.8 mg/kg           |

|                                                                                                                  |                  |
|------------------------------------------------------------------------------------------------------------------|------------------|
| Potassium (K)(a,b,e,f)                                                                                           | 1.056 ± 0.049 %  |
| Rubidium (Rb)(a,c)                                                                                               | 51.0 ± 1.5 mg/kg |
| Sodium (Na)(a,b)                                                                                                 | 4240 ± 60 mg/kg  |
| Strontium (Sr)(b,e)                                                                                              | 215 ± 17 mg/kg   |
| Sulfur (S)(b,f)                                                                                                  | 5.51 ± 0.36 %    |
| Titanium (Ti)(a,b,c,e,f)                                                                                         | 4021 ± 86 mg/kg  |
| Vanadium (V)(a,e)                                                                                                | 127 ± 11 mg/kg   |
| Zinc (Zn)(a,b,c,d,e)                                                                                             | 4800 ± 270 mg/kg |
| (a) INAA (NIST) (b) WDXRF (NIST) (c) PAA (d) SSGFAAS (e) PIXE (f) PGAA (NIST) (g) Isotope dilution ICP-MS (NIST) |                  |

**Table S2.** Comparison of colorimetric and ICP-MS measurements for Fe, Cu, and Mn for an SRM-1648a extract.

| Metal | Extract concentration, $\mu\text{M}$ |        | Extraction Efficiency (%) |        |
|-------|--------------------------------------|--------|---------------------------|--------|
|       | Colorimetric                         | ICP-MS | Colorimetric              | ICP-MS |
| TOTFe | 125.4                                | 105.9  | 17.9                      | 15.1   |
| Cu    | 4.2                                  | 4.5    | 44.3                      | 46.9   |
| Mn    | 6.6                                  | 6.7    | 45.6                      | 46.5   |



**Table S3.** Slope, intercept, and R-square for colorimetric method calibration for Fe in the DI water and 0.1M phosphate buffer matrix.

| Method            | ICP-MS analysis |                       | Colorimetric analysis |                       |
|-------------------|-----------------|-----------------------|-----------------------|-----------------------|
|                   | DI water        | 0.1M phosphate buffer | DI water              | 0.1M phosphate buffer |
| Fe, $\mu\text{M}$ |                 |                       |                       |                       |
| R <sup>2</sup>    | 0.994           | 0.959                 | 0.997                 | 0.995                 |
| Slope             | 1.03            | 0.31                  | 1.01                  | 0.97                  |
| Intercept         | -1.34           | -0.17                 | -0.89                 | -0.15                 |

**Table S4.** Slope, intercept, and R-square for colorimetric method calibration for Mn in the DI water and 0.1M phosphate buffer matrix.

| Method            | ICP-MS analysis |                       | Colorimetric analysis |                       |
|-------------------|-----------------|-----------------------|-----------------------|-----------------------|
|                   | DI water        | 0.1M phosphate buffer | DI water              | 0.1M phosphate buffer |
| Mn, $\mu\text{M}$ |                 |                       |                       |                       |
| R <sup>2</sup>    | 0.9997          | 0.917                 | 0.999                 | 0.999                 |
| Slope             | 1.09            | 0.41                  | 1.05                  | 0.84                  |
| Intercept         | -0.18           | 0.17                  | -0.12                 | -0.33                 |

**Table S5.** Slope, intercept, and R-square for colorimetric method calibration for Cu in the DI water and 0.1M phosphate buffer matrix.

| Method            | ICP-MS analysis |                       | Colorimetric analysis |                       |
|-------------------|-----------------|-----------------------|-----------------------|-----------------------|
|                   | DI water        | 0.1M phosphate buffer | DI water              | 0.1M phosphate buffer |
| Cu, $\mu\text{M}$ |                 |                       |                       |                       |
| R <sup>2</sup>    | 0.9999          | 0.871                 | 0.999                 | 0.997                 |
| Slope             | 0.98            | 0.39                  | 0.96                  | 0.78                  |
| Intercept         | -0.13           | 0.22                  | 0.03                  | -0.60                 |

**Table S6.** Method Detection limit for the colorimetric analysis in DI water and 0.1M phosphate buffer matrices.

| Method/ matrix        | Total Fe, $\mu\text{M}$ | Fe(II), $\mu\text{M}$ | Mn(II), $\mu\text{M}$ | Cu(II), $\mu\text{M}$ |
|-----------------------|-------------------------|-----------------------|-----------------------|-----------------------|
| DI water              | 0.5                     | 0.5                   | 0.5                   | 0.5                   |
| 0.1M phosphate buffer | 0.5                     | 0.5                   | 1.0                   | 1.4                   |

**Table S7.** Thermodynamic data for the metals in their aqueous phase complexes and solid forms at 25°C. The thermodynamic data in MINEQL was supplemented from the NIST database to account for all possible complexes and solids. Note that all modeling was done at 37 °C as MINEQL corrects the equilibrium constants for temperature and ionic strength using the Van't Hoff and Davies equation respectively.

| <b>Cu(I)</b>                                    | <b>H<sub>2</sub>O</b> | <b>H<sup>+</sup></b> | <b>CO<sub>3</sub><sup>2-</sup></b> | <b>Cu<sup>1+</sup></b> | <b>PO<sub>4</sub><sup>3-</sup></b> | <b>log k</b> | <b>delta H</b> |
|-------------------------------------------------|-----------------------|----------------------|------------------------------------|------------------------|------------------------------------|--------------|----------------|
| <b>Solids</b>                                   |                       |                      |                                    |                        |                                    |              |                |
| Cuprite                                         | 1                     | -2                   | 0                                  | 2                      | 0                                  | 1.406        | 29.642         |
| <b>Cu(II)</b>                                   | <b>H<sub>2</sub>O</b> | <b>H<sup>+</sup></b> | <b>CO<sub>3</sub><sup>2-</sup></b> | <b>Cu<sup>2+</sup></b> | <b>PO<sub>4</sub><sup>3-</sup></b> | <b>log k</b> | <b>delta H</b> |
| <b>Aqueous</b>                                  |                       |                      |                                    |                        |                                    |              |                |
| Cu(OH) <sub>2</sub>                             | 2                     | -2                   | 0                                  | 1                      | 0                                  | -16.194      | 0              |
| Cu <sub>2</sub> (OH) <sub>2</sub> <sup>+2</sup> | 2                     | -2                   | 0                                  | 2                      | 0                                  | -10.594      | 18.313         |
| Cu(OH) <sub>4</sub> <sup>-2</sup>               | 4                     | -4                   | 0                                  | 1                      | 0                                  | -39.98       | 0              |
| Cu(OH) <sup>+</sup>                             | 1                     | -1                   | 0                                  | 1                      | 0                                  | -7.497       | 8.559          |
| Cu(OH) <sub>3</sub> <sup>-</sup>                | 3                     | -3                   | 0                                  | 1                      | 0                                  | -26.879      | 0              |
| CuHCO <sub>3</sub> <sup>+</sup>                 | 0                     | 1                    | 1                                  | 1                      | 0                                  | 12.129       | 0              |
| CuCO <sub>3</sub>                               | 0                     | 0                    | 1                                  | 1                      | 0                                  | 6.77         | 0              |

|                                                        |                       |                      |                                    |                        |                                    |              |                |
|--------------------------------------------------------|-----------------------|----------------------|------------------------------------|------------------------|------------------------------------|--------------|----------------|
| $\text{Cu}(\text{CO}_3)_2^{-2}$                        | 0                     | 0                    | 2                                  | 1                      | 0                                  | 10.2         | 0              |
| $\text{CuHPO}_4$                                       | 0                     | 1                    | 0                                  | 1                      | 1                                  | 16.5         | 0              |
| <b>Solids</b>                                          |                       |                      |                                    |                        |                                    |              |                |
| Azurite                                                | 2                     | -2                   | 2                                  | 3                      | 0                                  | 16.906       | 22.758         |
| Malachite                                              | 2                     | -2                   | 1                                  | 2                      | 0                                  | 5.306        | -18.255        |
| Tenorite                                               | 1                     | -2                   | 0                                  | 1                      | 0                                  | -7.644       | 15.504         |
| $\text{Cu}(\text{OH})_2$                               | 2                     | -2                   | 0                                  | 1                      | 0                                  | -8.674       | 13.485         |
| $\text{Cu}_3(\text{PO}_4)_2 \cdot 3\text{H}_2\text{O}$ | 3                     | 0                    | 0                                  | 3                      | 2                                  | 35.12        | 0              |
| $\text{CuCO}_3$                                        | 0                     | 0                    | 1                                  | 1                      | 1                                  | 11.5         | 0              |
| $\text{Cu}_3(\text{PO}_4)_2$                           | 0                     | 0                    | 0                                  | 3                      | 2                                  | 36.85        | 0              |
| <b>Fe(III)</b>                                         | <b>H<sub>2</sub>O</b> | <b>H<sup>+</sup></b> | <b>CO<sub>3</sub><sup>2-</sup></b> | <b>Fe<sup>3+</sup></b> | <b>PO<sub>4</sub><sup>3-</sup></b> | <b>log k</b> | <b>delta H</b> |
| <b>Aqueous</b>                                         |                       |                      |                                    |                        |                                    |              |                |
| $\text{Fe}_3(\text{OH})_4^{+5}$                        | 4                     | -4                   | 0                                  | 3                      | 0                                  | -6.288       | 15.593         |
| $\text{Fe}(\text{OH})_4^-$                             | 4                     | -4                   | 0                                  | 1                      | 0                                  | -21.588      | 0              |
| $\text{Fe}(\text{OH})_3$                               | 3                     | -3                   | 0                                  | 1                      | 0                                  | -12.56       | 24.809         |
| $\text{Fe}_2(\text{OH})_2^{+4}$                        | 2                     | -2                   | 0                                  | 2                      | 0                                  | -2.854       | 13.771         |

|                                                |                       |                      |                                    |                        |                                    |              |                |
|------------------------------------------------|-----------------------|----------------------|------------------------------------|------------------------|------------------------------------|--------------|----------------|
| Fe(OH) <sub>2</sub> <sup>+</sup>               | 2                     | 2                    | 0                                  | 1                      | 0                                  | -4.954       | 0              |
| FeOH <sup>+2</sup>                             | 1                     | -1                   | 0                                  | 1                      | 0                                  | -2.187       | 9.993          |
| FeHPO <sub>4</sub> <sup>+</sup>                | 0                     | 1                    | 0                                  | 1                      | 1                                  | 22.292       | -7.3           |
| FeH <sub>2</sub> PO <sub>4</sub> <sup>+2</sup> | 0                     | 2                    | 0                                  | 1                      | 1                                  | 23.852       | 0              |
| <b>Solids</b>                                  |                       |                      |                                    |                        |                                    |              |                |
| Goethite                                       | 2                     | -3                   | 0                                  | 1                      | 0                                  | -0.491       | 14.48          |
| Lepidocrocite                                  | 2                     | -3                   | 0                                  | 1                      | 0                                  | -1.371       | 0              |
| Hematite                                       | 3                     | -6                   | 0                                  | 2                      | 0                                  | 1.418        | 30.829         |
| Ferrihydrite                                   | 3                     | -3                   | 0                                  | 1                      | 0                                  | -3.191       | 17.573         |
| Maghemite                                      | 3                     | -6                   | 0                                  | 2                      | 0                                  | -6.386       | 0              |
| Strengite                                      | 2                     | 0                    | 0                                  | 1                      | 1                                  | 26.4         | 2.237          |
| <b>Fe(II)</b>                                  | <b>H<sub>2</sub>O</b> | <b>H<sup>+</sup></b> | <b>CO<sub>3</sub><sup>2-</sup></b> | <b>Fe<sup>2+</sup></b> | <b>PO<sub>4</sub><sup>3-</sup></b> | <b>log k</b> | <b>delta H</b> |
| <b>Aqueous</b>                                 |                       |                      |                                    |                        |                                    |              |                |
| FeOH <sup>+</sup>                              | 1                     | -1                   | 0                                  | 1                      | 0                                  | -9.397       | 13.339         |
| Fe(OH) <sub>2</sub>                            | 2                     | -2                   | 0                                  | 1                      | 0                                  | -20.494      | 28.59          |
| Fe(OH) <sub>3</sub> <sup>-</sup>               | 3                     | -3                   | 0                                  | 1                      | 0                                  | -28.991      | 30.218         |

|                                                 |                       |                      |                                    |                        |                                    |              |                |
|-------------------------------------------------|-----------------------|----------------------|------------------------------------|------------------------|------------------------------------|--------------|----------------|
| FeHCO <sub>3</sub> <sup>+</sup>                 | 0                     | 1                    | 1                                  | 1                      | 0                                  | 11.429       | 0              |
| FeH <sub>2</sub> PO <sub>4</sub> <sup>+</sup>   | 0                     | 2                    | 0                                  | 1                      | 1                                  | 22.273       | 0              |
| FeHPO <sub>4</sub>                              | 0                     | 1                    | 0                                  | 1                      | 1                                  | 15.975       | 0              |
| <b>Solids</b>                                   |                       |                      |                                    |                        |                                    |              |                |
| Wusite                                          | 1                     | -2                   | 0                                  | 0.95                   | 0                                  | -11.688      | 24.842         |
| Fe(OH) <sub>2</sub>                             | 2                     | -2                   | 0                                  | 1                      | 0                                  | -13.564      | 0              |
| Vivianite                                       | 8                     | 0                    | 0                                  | 3                      | 2                                  | 36           | 0              |
| Siderite                                        | 0                     | 0                    | 1                                  | 1                      | 0                                  | 10.24        | 3.824          |
| Fe <sub>3</sub> (PO <sub>4</sub> ) <sub>2</sub> | 0                     | 0                    | 0                                  | 3                      | 2                                  | 36           | 0              |
| <b>Mn(II)</b>                                   | <b>H<sub>2</sub>O</b> | <b>H<sup>+</sup></b> | <b>CO<sub>3</sub><sup>2-</sup></b> | <b>Mn<sup>2+</sup></b> | <b>PO<sub>4</sub><sup>3-</sup></b> | <b>log k</b> | <b>delta H</b> |
| <b>Aqueous</b>                                  |                       |                      |                                    |                        |                                    |              |                |
| Mn(OH) <sub>4</sub> <sup>-2</sup>               | 4                     | -4                   | 0                                  | 1                      | 0                                  | -48.28       | 0              |
| MnOH <sup>+</sup>                               | 1                     | -1                   | 0                                  | 1                      | 0                                  | -10.597      | 13.339         |
| Mn(OH) <sub>3</sub> <sup>-</sup>                | 3                     | -3                   | 0                                  | 1                      | 0                                  | -34.8        | 0              |
| MnHCO <sub>3</sub> <sup>+</sup>                 | 0                     | 1                    | 1                                  | 1                      | 0                                  | 11.629       | -2.534         |
| MnCO <sub>3</sub>                               | 0                     | 0                    | 1                                  | 1                      | 0                                  | 4.7          | 0              |

|                                                 |                       |                      |                                    |                        |                                    |              |                |
|-------------------------------------------------|-----------------------|----------------------|------------------------------------|------------------------|------------------------------------|--------------|----------------|
| MnHPO <sub>4</sub>                              | 0                     | 1                    | 0                                  | 1                      | 1                                  | 15.8         | 0              |
| <b>Solids</b>                                   |                       |                      |                                    |                        |                                    |              |                |
| Pyrochroite                                     | 2                     | -2                   | 0                                  | 1                      | 0                                  | -15.194      | 23.186         |
| MnHPO <sub>4</sub>                              | 0                     | 1                    | 0                                  | 1                      | 1                                  | 25.4         | 0              |
| Rhodochrosite                                   | 0                     | 0                    | 1                                  | 1                      | 0                                  | 10.58        | 0.449          |
| Mn <sub>3</sub> (PO <sub>4</sub> ) <sub>2</sub> | 0                     | 0                    | 0                                  | 3                      | 2                                  | 23.827       | -2.12          |
| <b>Mn(III)</b>                                  | <b>H<sub>2</sub>O</b> | <b>H<sup>+</sup></b> | <b>CO<sub>3</sub><sup>2-</sup></b> | <b>Mn<sup>3+</sup></b> | <b>PO<sub>4</sub><sup>3-</sup></b> | <b>log k</b> | <b>delta H</b> |
| <b>Solids</b>                                   |                       |                      |                                    |                        |                                    |              |                |
| Bixbyite                                        | 3                     | -6                   | 0                                  | 2                      | 0                                  | 0.644        | 29.754         |
| <b>Mn(IV)</b>                                   | <b>H<sub>2</sub>O</b> | <b>H<sup>+</sup></b> | <b>CO<sub>3</sub><sup>2-</sup></b> | <b>Mn<sup>2+</sup></b> | <b>PO<sub>4</sub><sup>3-</sup></b> | <b>log k</b> | <b>delta H</b> |
| <b>Solids</b>                                   |                       |                      |                                    |                        |                                    |              |                |
| Manganite                                       | 2                     | -3                   | 0                                  | 1                      | 0                                  | -25.34       | 0              |
| <b>Ni(II)</b>                                   | <b>H<sub>2</sub>O</b> | <b>H<sup>+</sup></b> | <b>CO<sub>3</sub><sup>2-</sup></b> | <b>Ni<sup>2+</sup></b> | <b>PO<sub>4</sub><sup>3-</sup></b> | <b>log k</b> | <b>delta H</b> |
| <b>Aqueous</b>                                  |                       |                      |                                    |                        |                                    |              |                |
| Ni(OH) <sub>2</sub> (aq)                        | 2                     | -2                   | 0                                  | 1                      | 0                                  | -18.994      | 0              |
| Ni(OH) <sub>3</sub> <sup>-</sup>                | 3                     | -3                   | 0                                  | 1                      | 0                                  | -29.991      | 0              |

|                                                 |                       |                      |                                    |                        |                                    |              |                |
|-------------------------------------------------|-----------------------|----------------------|------------------------------------|------------------------|------------------------------------|--------------|----------------|
| NiCO <sub>3</sub> (aq)                          | 0                     | 0                    | 1                                  | 1                      | 0                                  | 4.572        | 0              |
| NiH <sub>2</sub> PO <sub>4</sub> <sup>+</sup>   | 0                     | 2                    | 0                                  | 1                      | 1                                  | 20.5         | 0              |
| NiHCO <sub>3</sub> <sup>+</sup>                 | 0                     | 1                    | 1                                  | 1                      | 0                                  | 12.42        | 0              |
| NiHPO <sub>4</sub> (aq)                         | 0                     | 1                    | 0                                  | 1                      | 1                                  | 15.33        | 0              |
| NiOH <sup>+</sup>                               | 1                     | -1                   | 0                                  | 1                      | 0                                  | -9.897       | 12.383         |
| <b>Solids</b>                                   |                       |                      |                                    |                        |                                    |              |                |
| Bunsenite                                       | 1                     | -2                   | 0                                  | 1                      | 0                                  | -12.446      | 23.932         |
| Ni(OH) <sub>2</sub>                             | 2                     | -2                   | 0                                  | 1                      | 0                                  | -12.794      | 22.935         |
| NiCO <sub>3</sub>                               | 0                     | 0                    | 1                                  | 1                      | 0                                  | 6.87         | 9.94           |
| Ni <sub>3</sub> (PO <sub>4</sub> ) <sub>2</sub> | 0                     | 0                    | 0                                  | 3                      | 2                                  | 31.3         | 0              |
| <b>Zn(II)</b>                                   | <b>H<sub>2</sub>O</b> | <b>H<sup>+</sup></b> | <b>CO<sub>3</sub><sup>2-</sup></b> | <b>Zn<sup>2+</sup></b> | <b>PO<sub>4</sub><sup>3-</sup></b> | <b>log k</b> | <b>delta H</b> |
| <b>Aqueous</b>                                  |                       |                      |                                    |                        |                                    |              |                |
| Zn(CO <sub>3</sub> ) <sub>2</sub> <sup>-2</sup> | 0                     | 0                    | 2                                  | 1                      | 0                                  | 7.3          | 0              |
| Zn(OH) <sub>2</sub> (aq)                        | 2                     | -2                   | 0                                  | 1                      | 0                                  | -17.794      | 0              |
| Zn(OH) <sub>3</sub> <sup>-</sup>                | 3                     | -3                   | 0                                  | 1                      | 0                                  | -28.091      | 0              |
| Zn(OH) <sub>4</sub> <sup>-2</sup>               | 4                     | -4                   | 0                                  | 1                      | 0                                  | -40.488      | 0              |



|                                                                    |                       |                      |                                    |                            |                                    |              |                |
|--------------------------------------------------------------------|-----------------------|----------------------|------------------------------------|----------------------------|------------------------------------|--------------|----------------|
| Zn(CO <sub>3</sub> ) <sub>2</sub>                                  | 0                     | 1                    | 0                                  | 1                          | 1                                  | 7.3          | 0              |
| ZnCO <sub>3</sub> (aq)                                             | 0                     | 0                    | 1                                  | 1                          | 0                                  | 4.76         | 0              |
| ZnHCO <sub>3</sub> <sup>+</sup>                                    | 0                     | 1                    | 1                                  | 1                          | 0                                  | 11.829       | 0              |
| ZnHPO <sub>4</sub> (aq)                                            | 0                     | 1                    | 0                                  | 1                          | 1                                  | 15.69        | 0              |
| ZnOH <sup>+</sup>                                                  | 1                     | -1                   | 0                                  | 1                          | 0                                  | -8.997       | 13.339         |
| <b>Solids</b>                                                      |                       |                      |                                    |                            |                                    |              |                |
| Zn(OH) <sub>2</sub> [Am]                                           | 2                     | -2                   | 0                                  | 1                          | 0                                  | -12.474      | 19.269         |
| Zincite                                                            | 1                     | -2                   | 0                                  | 1                          | 0                                  | -11.334      | 21.42          |
| Zn(OH) <sub>2</sub>                                                | 2                     | -2                   | 0                                  | 1                          | 0                                  | -12.2        | 0              |
| ZnO (active)                                                       | 1                     | -2                   | 0                                  | 1                          | 0                                  | -11.188      | 21.214         |
| ZnCO <sub>3</sub> :1H <sub>2</sub> O                               | 1                     | 0                    | 1                                  | 1                          | 0                                  | 10.26        | 0              |
| Zn <sub>3</sub> (PO <sub>4</sub> ) <sub>2</sub> :4H <sub>2</sub> O | 4                     | 0                    | 0                                  | 3                          | 2                                  | 35.42        | 0              |
| Smithsonite                                                        | 0                     | 0                    | 1                                  | 1                          | 0                                  | 10           | 3.786          |
| Zn <sub>3</sub> (PO <sub>4</sub> ) <sub>2</sub>                    | 0                     | 0                    | 0                                  | 3                          | 2                                  | 35.42        | 0              |
| <b>Cr(III)</b>                                                     | <b>H<sub>2</sub>O</b> | <b>H<sup>+</sup></b> | <b>CO<sub>3</sub><sup>2-</sup></b> | <b>Cr(OH)<sub>2+</sub></b> | <b>PO<sub>4</sub><sup>3-</sup></b> | <b>log k</b> | <b>delta H</b> |

|                                                              |                       |                      |                                    |                                      |                                    |              |                |
|--------------------------------------------------------------|-----------------------|----------------------|------------------------------------|--------------------------------------|------------------------------------|--------------|----------------|
| <b>Aqueous</b>                                               |                       |                      |                                    |                                      |                                    |              |                |
| Cr(OH) <sub>3</sub> (aq)                                     | 1                     | -1                   | 0                                  | 1                                    | 0                                  | -8.422       | 0              |
| Cr(OH) <sub>4</sub> <sup>-</sup>                             | 2                     | -2                   | 0                                  | 1                                    | 0                                  | -17.819      | 0              |
| CrH <sub>2</sub> PO <sub>4</sub> <sup>+2</sup>               | -2                    | 4                    | 0                                  | 1                                    | 1                                  | 31.907       | 0              |
| CrOH <sup>+2</sup>                                           | -1                    | 1                    | 0                                  | 1                                    | 0                                  | 5.912        | -18.621        |
| <b>Solids</b>                                                |                       |                      |                                    |                                      |                                    |              |                |
| Cr(OH) <sub>3</sub> [Am]                                     | 1                     | -1                   | 0                                  | 1                                    | 0                                  | 0.75         | 0              |
| Cr(OH) <sub>3</sub>                                          | 1                     | -1                   | 0                                  | 1                                    | 0                                  | -1.336       | 7.115          |
| Cr <sub>2</sub> O <sub>3</sub>                               | -1                    | -2                   | 0                                  | 2                                    | 0                                  | 2.358        | 12.125         |
| <b>Cr(VI)</b>                                                | <b>H<sub>2</sub>O</b> | <b>H<sup>+</sup></b> | <b>CO<sub>3</sub><sup>2-</sup></b> | <b>CrO<sub>4</sub><sup>(2-</sup></b> | <b>PO<sub>4</sub><sup>3-</sup></b> | <b>log k</b> | <b>delta H</b> |
|                                                              |                       |                      |                                    | )                                    |                                    |              |                |
| <b>Aqueous</b>                                               |                       |                      |                                    |                                      |                                    |              |                |
| CrO <sub>3</sub> H <sub>2</sub> PO <sub>4</sub> <sup>-</sup> | -1                    | 4                    | 0                                  | 1                                    | 1                                  | 29.363       | 0              |
| CrO <sub>3</sub> HPO <sub>4</sub> <sup>-2</sup>              | -1                    | 3                    | 0                                  | 1                                    | 1                                  | 26.681       | 0              |
| Cr <sub>2</sub> O <sub>7</sub> <sup>-2</sup>                 | -1                    | 2                    | 0                                  | 2                                    | 0                                  | 14.56        | -3.585         |
| <b>Solids</b>                                                |                       |                      |                                    |                                      |                                    |              |                |

|                                                 |                       |                      |                                    |                        |                                    |              |                |
|-------------------------------------------------|-----------------------|----------------------|------------------------------------|------------------------|------------------------------------|--------------|----------------|
| CrO <sub>3</sub>                                | -1                    | 2                    | 0                                  | 1                      | 0                                  | 3.21         | 1.245          |
| <b>Co(II)</b>                                   | <b>H<sub>2</sub>O</b> | <b>H<sup>+</sup></b> | <b>CO<sub>3</sub><sup>2-</sup></b> | <b>Co<sup>2+</sup></b> | <b>PO<sub>4</sub><sup>3-</sup></b> | <b>log k</b> | <b>delta H</b> |
| <b>Aqueous</b>                                  |                       |                      |                                    |                        |                                    |              |                |
| Co(OH) <sub>2</sub> (aq)                        | 2                     | -2                   | 0                                  | 1                      | 0                                  | -18.794      | 0              |
| Co(OH) <sub>3</sub> <sup>-</sup>                | 3                     | -3                   | 0                                  | 1                      | 0                                  | -31.491      | 0              |
| Co <sub>4</sub> (OH) <sub>4</sub> <sup>+4</sup> | 4                     | -4                   | 0                                  | 4                      | 0                                  | -30.488      | 0              |
| CoCO <sub>3</sub> (aq)                          | 0                     | 0                    | 1                                  | 1                      | 0                                  | 4.228        | 0              |
| CoHCO <sub>3</sub> <sup>+</sup>                 | 0                     | 1                    | 1                                  | 1                      | 0                                  | 12.22        | 0              |
| CoHPO <sub>4</sub> (aq)                         | 0                     | 1                    | 0                                  | 1                      | 1                                  | 15.413       | 0              |
| CoOH <sup>+</sup>                               | 1                     | -1                   | 0                                  | 1                      | 0                                  | -9.697       | 0              |
| <b>Solids</b>                                   |                       |                      |                                    |                        |                                    |              |                |
| CoO                                             | 1                     | -2                   | 0                                  | 1                      | 0                                  | -13.586      | 25.405         |
| Co(OH) <sub>2</sub>                             | 2                     | -2                   | 0                                  | 1                      | 0                                  | -13.094      | 0              |
| CoHPO <sub>4</sub>                              | 0                     | 1                    | 0                                  | 1                      | 1                                  | 19.061       | 0              |
| CoCO <sub>3</sub>                               | 0                     | 0                    | 1                                  | 1                      | 0                                  | 9.98         | 3.05           |
| Co <sub>3</sub> (PO <sub>4</sub> ) <sub>2</sub> | 0                     | 0                    | 0                                  | 3                      | 2                                  | 34.688       | 0              |

| <b>Co(III)</b>                                 | <b>H<sub>2</sub>O</b> | <b>H<sup>+</sup></b> | <b>CO<sub>3</sub><sup>2-</sup></b> | <b>Co<sup>3+</sup></b> | <b>PO<sub>4</sub><sup>3-</sup></b> | <b>log k</b> | <b>delta H</b> |
|------------------------------------------------|-----------------------|----------------------|------------------------------------|------------------------|------------------------------------|--------------|----------------|
| <b>Aqueous</b>                                 |                       |                      |                                    |                        |                                    |              |                |
| CoOH <sup>+2</sup>                             | 1                     | -1                   | 0                                  | 1                      | 0                                  | -1.291       | 0              |
| <b>Solids</b>                                  |                       |                      |                                    |                        |                                    |              |                |
| Co(OH) <sub>3</sub>                            | 3                     | -3                   | 0                                  | 1                      | 0                                  | 2.309        | 22.091         |
| <b>V(III)</b>                                  | <b>H<sub>2</sub>O</b> | <b>H<sup>+</sup></b> | <b>CO<sub>3</sub><sup>2-</sup></b> | <b>V<sup>3+</sup></b>  | <b>PO<sub>4</sub><sup>3-</sup></b> | <b>log k</b> | <b>delta H</b> |
| <b>Aqueous</b>                                 |                       |                      |                                    |                        |                                    |              |                |
| V(OH) <sub>3</sub> (aq)                        | 3                     | -3                   | 0                                  | 1                      | 0                                  | -3.084       | 0              |
| V <sub>2</sub> (OH) <sub>3</sub> <sup>+3</sup> | 3                     | -3                   | 0                                  | 2                      | 0                                  | -10.119      | 0              |
| V(OH) <sub>2</sub> <sup>+</sup>                | 2                     | -2                   | 0                                  | 1                      | 0                                  | -6.274       | 0              |
| VOH <sup>+2</sup>                              | 1                     | -1                   | 0                                  | 1                      | 0                                  | -2.297       | 10.471         |
| V <sub>2</sub> (OH) <sub>2</sub> <sup>+4</sup> | 2                     | -2                   | 0                                  | 2                      | 0                                  | 3.794        | 0              |
| <b>Solids</b>                                  |                       |                      |                                    |                        |                                    |              |                |
| V <sub>2</sub> O <sub>3</sub>                  | 1.5                   | -3                   | 0                                  | 0                      | 1                                  | -4.9         | 19.72          |
| V(OH) <sub>3</sub>                             | 3                     | -3                   | 0                                  | 0                      | 1                                  | -7.591       | 0              |
| <b>Al(III)</b>                                 | <b>H<sub>2</sub>O</b> | <b>H<sup>+</sup></b> | <b>CO<sub>3</sub><sup>2-</sup></b> | <b>Al<sup>3+</sup></b> | <b>PO<sub>4</sub><sup>3-</sup></b> | <b>log k</b> | <b>delta H</b> |

|                                                   |                       |                      |                                    |                        |                                    |              |                |
|---------------------------------------------------|-----------------------|----------------------|------------------------------------|------------------------|------------------------------------|--------------|----------------|
| <b>Aqueous</b>                                    |                       |                      |                                    |                        |                                    |              |                |
| Al(OH) <sub>2</sub>                               | 2                     | -2                   | 0                                  | 1                      | 0                                  | -10.094      | 0              |
| Al(OH) <sub>3</sub> (aq)                          | 3                     | -3                   | 0                                  | 1                      | 0                                  | -16.791      | 0              |
| Al(OH) <sub>4</sub>                               | 4                     | -4                   | 0                                  | 1                      | 0                                  | -22.688      | 41.405         |
| AlOH                                              | 1                     | -1                   | 0                                  | 1                      | 0                                  | -4.997       | 11.427         |
| Al <sub>2</sub> (OH) <sub>2</sub> CO <sub>3</sub> | 2                     | -2                   | 1                                  | 2                      | 0                                  | -4.31        | 0              |
| Al <sub>2</sub> PO <sub>4</sub>                   | 0                     | 0                    | 0                                  | 2                      | 1                                  | -18.98       | 0              |
| <b>Solids</b>                                     |                       |                      |                                    |                        |                                    |              |                |
| Diaspore                                          | 2                     | -3                   | 0                                  | 1                      | 0                                  | -6.873       | 24.63          |
| Al <sub>2</sub> O <sub>3</sub>                    | 3                     | -6                   | 0                                  | 2                      | 0                                  | -19.652      | 61.805         |
| Boehmite                                          | 2                     | -3                   | 0                                  | 1                      | 0                                  | -8.578       | 28.13          |
| Al(OH) <sub>3</sub> [am]                          | 3                     | -3                   | 0                                  | 1                      | 0                                  | -10.8        | 26.53          |
| Gibbsite                                          | 3                     | -3                   | 0                                  | 1                      | 0                                  | -8.291       | 22.8           |
| <b>Ca(II)</b>                                     | <b>H<sub>2</sub>O</b> | <b>H<sup>+</sup></b> | <b>CO<sub>3</sub><sup>2-</sup></b> | <b>Ca<sup>2+</sup></b> | <b>PO<sub>4</sub><sup>3-</sup></b> | <b>log k</b> | <b>delta H</b> |
| <b>Aqueous</b>                                    |                       |                      |                                    |                        |                                    |              |                |
| CaOH                                              | 1                     | -1                   | 0                                  | 1                      | 0                                  | -12.697      | 15.323         |

|                                                                     |                       |                      |                                    |                        |                                    |              |                |
|---------------------------------------------------------------------|-----------------------|----------------------|------------------------------------|------------------------|------------------------------------|--------------|----------------|
| CaHCO <sub>3</sub> <sup>+</sup>                                     | 0                     | 1                    | 1                                  | 1                      | 0                                  | 11.599       | 1.291          |
| CaH <sub>2</sub> PO <sub>4</sub> <sup>+</sup>                       | 0                     | 2                    | 0                                  | 1                      | 1                                  | 20.923       | -1.434         |
| CaHPO <sub>4</sub> (aq)                                             | 0                     | 1                    | 0                                  | 1                      | 1                                  | 15.035       | -0.717         |
| CaCO <sub>3</sub> (aq)                                              | 0                     | 0                    | 1                                  | 1                      | 0                                  | 3.2          | 3.824          |
| CaPO <sub>4</sub> <sup>-</sup>                                      | 0                     | 0                    | 0                                  | 1                      | 1                                  | 6.46         | 3.1            |
| <b>Solids</b>                                                       |                       |                      |                                    |                        |                                    |              |                |
| Lime                                                                | 1                     | -2                   | 0                                  | 1                      | 0                                  | -32.699      | 46.346         |
| Portlandite                                                         | 2                     | -2                   | 0                                  | 1                      | 0                                  | -22.804      | 30.741         |
| Hydroxylapatite                                                     | 1                     | -1                   | 0                                  | 5                      | 3                                  | 44.333       | 0              |
| CaHPO <sub>4</sub> ·2H <sub>2</sub> O                               | 2                     | 1                    | 0                                  | 1                      | 1                                  | 18.995       | -5.497         |
| Ca <sub>4</sub> H(PO <sub>4</sub> ) <sub>3</sub> ·3H <sub>2</sub> O | 3                     | 1                    | 0                                  | 4                      | 3                                  | 47.08        | 0              |
| CaHPO <sub>4</sub>                                                  | 0                     | 1                    | 0                                  | 1                      | 1                                  | 19.275       | -7.409         |
| Aragonite                                                           | 0                     | 0                    | 1                                  | 1                      | 0                                  | 8.3          | 2.868          |
| Calcite                                                             | 0                     | 0                    | 1                                  | 1                      | 0                                  | 8.48         | 1.912          |
| Ca <sub>3</sub> (PO <sub>4</sub> ) <sub>2</sub> (β)                 | 0                     | 0                    | 0                                  | 3                      | 2                                  | 28.92        | -12.906        |
| <b>Mg(II)</b>                                                       | <b>H<sub>2</sub>O</b> | <b>H<sup>+</sup></b> | <b>CO<sub>3</sub><sup>2-</sup></b> | <b>Mg<sup>2+</sup></b> | <b>PO<sub>4</sub><sup>3-</sup></b> | <b>log k</b> | <b>delta H</b> |

|                                               |   |    |   |   |   |         |        |
|-----------------------------------------------|---|----|---|---|---|---------|--------|
| <b>Aqueous</b>                                |   |    |   |   |   |         |        |
| MgOH <sup>+</sup>                             | 1 | -1 | 0 | 1 | 0 | -11.397 | 16.207 |
| MgHCO <sub>3</sub> <sup>+</sup>               | 0 | 1  | 1 | 1 | 0 | 11.339  | -2.534 |
| MgHPO <sub>4</sub> (aq)                       | 0 | 2  | 0 | 1 | 1 | 15.175  | -0.717 |
| MgH <sub>2</sub> PO <sub>4</sub> <sup>+</sup> | 0 | 2  | 0 | 1 | 1 | 21.256  | -1.12  |
| MgCO <sub>3</sub> (aq)                        | 0 | 0  | 1 | 1 | 0 | 2.92    | 2.868  |
| MgPO <sub>4</sub> <sup>-</sup>                | 0 | 0  | 0 | 1 | 1 | 4.654   | 3.1    |
| <b>Solids</b>                                 |   |    |   |   |   |         |        |
| Hydromagnesite                                | 6 | -2 | 4 | 5 | 0 | 8.766   | 52.21  |
| Artinite                                      | 5 | -2 | 1 | 2 | 0 | -9.6    | 28.742 |
| Mg(OH) <sub>2</sub> (active)                  | 2 | -2 | 0 | 1 | 0 | -18.794 | 0      |
| Periclase                                     | 1 | -2 | 0 | 1 | 0 | -21.584 | 36.145 |
| Brucite                                       | 2 | -2 | 0 | 1 | 0 | -16.844 | 27.246 |
| MgHPO <sub>4</sub> ·3H <sub>2</sub> O         | 3 | 1  | 0 | 1 | 1 | 18.175  | 0      |
| Nesquehonite                                  | 3 | 0  | 1 | 1 | 0 | 4.67    | 5.789  |
| Magnesite                                     | 0 | 0  | 1 | 1 | 0 | 7.46    | -4.78  |

|                                                              |                       |                      |                                    |                                     |                                    |              |                |
|--------------------------------------------------------------|-----------------------|----------------------|------------------------------------|-------------------------------------|------------------------------------|--------------|----------------|
| Mg <sub>3</sub> (PO <sub>4</sub> ) <sub>2</sub>              | 0                     | 0                    | 0                                  | 3                                   | 2                                  | 23.28        | 0              |
| <b>Mo(II)</b>                                                | <b>H<sub>2</sub>O</b> | <b>H<sup>+</sup></b> | <b>CO<sub>3</sub><sup>2-</sup></b> | <b>MoO<sub>4</sub><sup>2-</sup></b> | <b>PO<sub>4</sub><sup>3-</sup></b> | <b>log k</b> | <b>delta H</b> |
| <b>Aqueous</b>                                               |                       |                      |                                    |                                     |                                    |              |                |
| H <sub>2</sub> Mo <sub>7</sub> O <sub>24</sub> <sup>-4</sup> | -4                    | 10                   | 0                                  | 7                                   | 0                                  | 64.159       | -51.386        |
| Mo <sub>7</sub> O <sub>24</sub> <sup>-6</sup>                | -4                    | 8                    | 0                                  | 7                                   | 0                                  | 52.99        | -54.493        |
| HMo <sub>7</sub> O <sub>24</sub> <sup>-5</sup>               | -4                    | 9                    | 0                                  | 7                                   | 0                                  | 59.377       | -52.103        |
| H <sub>3</sub> Mo <sub>7</sub> O <sub>24</sub> <sup>-3</sup> | -4                    | 11                   | 0                                  | 7                                   | 0                                  | 67.405       | -51.864        |
| HMoO <sub>4</sub> <sup>-</sup>                               | 0                     | 1                    | 0                                  | 1                                   | 0                                  | 4.299        | 4.78           |
| H <sub>2</sub> MoO <sub>4</sub> (aq)                         | 0                     | 2                    | 0                                  | 1                                   | 0                                  | 8.164        | -6.214         |
| <b>Solids</b>                                                |                       |                      |                                    |                                     |                                    |              |                |
| MoO <sub>3</sub>                                             | -1                    | 2                    | 0                                  | 1                                   | 0                                  | 8            | 0              |
| H <sub>2</sub> MoO <sub>4</sub>                              | 0                     | 2                    | 0                                  | 1                                   | 0                                  | 12.876       | -11.711        |
| <b>Pb(II)</b>                                                | <b>H<sub>2</sub>O</b> | <b>H<sup>+</sup></b> | <b>CO<sub>3</sub><sup>2-</sup></b> | <b>Pb<sup>2+</sup></b>              | <b>PO<sub>4</sub><sup>3-</sup></b> | <b>log k</b> | <b>delta H</b> |
| <b>Aqueous</b>                                               |                       |                      |                                    |                                     |                                    |              |                |
| Pb(OH) <sub>2</sub> (aq)                                     | 2                     | -2                   | 0                                  | 1                                   | 0                                  | -17.094      | 0              |
| Pb <sub>2</sub> OH <sup>+3</sup>                             | 1                     | -2                   | 0                                  | 2                                   | 0                                  | -6.397       | 0              |



|                                               |   |    |   |    |   |         |        |
|-----------------------------------------------|---|----|---|----|---|---------|--------|
| $\text{Pb(OH)}_3^-$                           | 3 | -3 | 0 | 1  | 0 | -28.091 | 0      |
| $\text{PbOH}^+$                               | 1 | -1 | 0 | 1  | 0 | -7.597  | 0      |
| $\text{Pb(OH)}_4^{-2}$                        | 4 | -4 | 0 | 1  | 0 | -39.699 | 0      |
| $\text{Pb}_3(\text{OH})_4^{+2}$               | 4 | -4 | 0 | 3  | 0 | -23.888 | 27.543 |
| $\text{Pb}_4(\text{OH})_4^{+4}$               | 4 | -4 | 0 | 4  | 0 | -19.988 | 21.09  |
| $\text{PbHCO}_3^+$                            | 0 | 1  | 1 | 1  | 0 | 13.2    | 0      |
| $\text{PbCO}_3$ (aq)                          | 0 | 0  | 1 | 0  | 0 | 6.478   | 0      |
| $\text{Pb(CO}_3)_2^{-2}$                      | 0 | 0  | 2 | 1  | 0 | 9.938   | 0      |
| $\text{PbPO}_4\text{H}_2$                     | 0 | 2  | 0 | 1  | 1 | -21.073 | 0      |
| $\text{PbPO}_4\text{H}$                       | 0 | 1  | 0 | 1  | 1 | -15.475 | 0      |
| <b>Solids</b>                                 |   |    |   |    |   |         |        |
| $\text{Pb}_{10}(\text{OH})_6\text{O(CO}_3)_6$ | 7 | -8 | 6 | 10 | 0 | 6.76    | 0      |
| $\text{Pb}_3\text{O}_2\text{CO}_3$            | 2 | -4 | 1 | 3  | 0 | -11.02  | 26.43  |
| $\text{Pb}_2\text{OCO}_3$                     | 1 | -2 | 1 | 2  | 0 | 0.558   | 9.756  |
| Hydrocerrusite                                | 2 | -2 | 2 | 3  | 0 | 18.77   | 0      |
| Litharge                                      | 1 | -2 | 0 | 1  | 0 | -12.694 | 15.655 |

|                                                 |      |    |   |   |   |         |        |
|-------------------------------------------------|------|----|---|---|---|---------|--------|
| Pb(OH) <sub>2</sub>                             | 2    | -2 | 0 | 1 | 0 | -8.15   | 13.99  |
| Massicot                                        | 1    | -2 | 0 | 1 | 0 | -12.894 | 15.977 |
| Pb <sub>2</sub> O(OH) <sub>2</sub>              | 3    | -4 | 0 | 2 | 0 | -26.188 | 0      |
| PbO:0.3H <sub>2</sub> O                         | 1.33 | -2 | 0 | 1 | 0 | -12.98  | 0      |
| Hydroxylpyromorphite                            | 1    | -2 | 0 | 5 | 3 | 62.79   | 0      |
| PbHPO <sub>4</sub>                              | 0    | 1  | 0 | 1 | 1 | 23.805  | 0      |
| Cerussite                                       | 0    | 0  | 1 | 1 | 0 | 13.13   | -5.925 |
| Pb <sub>3</sub> (PO <sub>4</sub> ) <sub>2</sub> | 0    | 0  | 0 | 3 | 2 | 43.53   | 0      |

**Table S8.** Solubilities of various precipitates for each metal under assay conditions (0.1M PO<sub>4</sub>, ionic strength=0.22, 37C, fixed solids). Three types of solids were considered: metal oxides, hydroxides, and phosphate-based solids based on previous work <sup>36</sup>.

| Metal   | Solid                                                                          | Solubility( $\mu$ M)  | pC, M |
|---------|--------------------------------------------------------------------------------|-----------------------|-------|
| Cu(I)   | Cuprite (Cu <sub>2</sub> O)                                                    | 4.1x 10 <sup>-3</sup> | -8.4  |
| Cu(II)  | Cu <sub>3</sub> (PO <sub>4</sub> ) <sub>2</sub>                                | 4.5                   | -5.3  |
|         | Tenorite (CuO)                                                                 | 9.8                   | -5.0  |
|         | Cu <sub>3</sub> (PO <sub>4</sub> ) <sub>2</sub> :3H <sub>2</sub> O             | 1.7x10 <sup>1</sup>   | -4.8  |
|         | Cu(OH) <sub>2</sub>                                                            | 1.2x10 <sup>2</sup>   | -3.9  |
| Fe(II)  | Fe <sub>3</sub> (PO <sub>4</sub> ) <sub>2</sub>                                | 2.9                   | -5.5  |
|         | Vivianite (Fe <sub>3</sub> (PO <sub>4</sub> ) <sub>2</sub> :8H <sub>2</sub> O) | 2.9                   | -5.5  |
|         | Wusite (FeO)                                                                   | 1.1x10 <sup>4</sup>   | -2.0  |
|         | Fe(OH) <sub>2</sub>                                                            | 3.1x10 <sup>5</sup>   | -0.5  |
| Fe(III) | Hematite (Fe <sub>2</sub> O <sub>3</sub> )                                     | 2.0x10 <sup>-7</sup>  | -12.7 |
|         | Goethite ( $\alpha$ - FeO(OH))                                                 | 3.4x10 <sup>-6</sup>  | -11.5 |
|         | Lepidocrocite ( $\gamma$ - FeO(OH))                                            | 6.6x10 <sup>-5</sup>  | -10.2 |
|         | Strengite (FePO <sub>4</sub> .2H <sub>2</sub> O)                               | 5.1x10 <sup>-4</sup>  | -9.3  |
|         | Ferrihydrite (Fe <sub>2</sub> O <sub>3</sub> .0.5H <sub>2</sub> O)             | 1.4x10 <sup>-3</sup>  | -8.9  |

|         |                                                                                                  |                       |       |
|---------|--------------------------------------------------------------------------------------------------|-----------------------|-------|
|         | Maghemite ( $\gamma$ - Fe <sub>2</sub> O <sub>3</sub> )                                          | 4.4x10 <sup>-3</sup>  | -8.4  |
| Mn(II)  | MnHPO <sub>4</sub>                                                                               | 2.6x10 <sup>-4</sup>  | -9.6  |
|         | Mn <sub>3</sub> (PO <sub>4</sub> ) <sub>2</sub>                                                  | 2.1x10 <sup>4</sup>   | -1.7  |
|         | Pyrochroite (Mn(OH) <sub>2</sub> )                                                               | 2.1x10 <sup>6</sup>   | 0.3   |
|         | Hausmannite ((Mn <sup>2+</sup> Mn <sup>3+</sup> ) <sub>2</sub> O <sub>4</sub> )                  | 2.5x10 <sup>-1</sup>  | -6.6  |
| Mn(III) | Manganite (MnO(OH))                                                                              | 6.4x10 <sup>-2</sup>  | -7.2  |
|         | Bixbyite ((Mn, Fe) <sub>2</sub> O <sub>3</sub> )                                                 | 2.0x10 <sup>-16</sup> | -21.7 |
| Mn(IV)  | Pyrolusite (MnO <sub>2</sub> )                                                                   | 2.3x10 <sup>-7</sup>  | -12.6 |
|         | Nsutite (Mn <sup>4+</sup> Mn <sup>2+</sup> O(OH) <sub>2</sub> )                                  | 8.4x10 <sup>-18</sup> | -23.1 |
|         | Birnessite ((Mn <sup>4+</sup> Mn <sup>3+</sup> ) <sub>2</sub> O <sub>2</sub> .5H <sub>2</sub> O) | 3.2x10 <sup>-17</sup> | -22.5 |
| Ni(II)  | Ni <sub>3</sub> (PO <sub>4</sub> ) <sub>2</sub>                                                  | 2.4x10 <sup>1</sup>   | -4.6  |
|         | Bunsenite (NiO)                                                                                  | 2.3x10 <sup>4</sup>   | -1.6  |
|         | Ni(OH) <sub>2</sub>                                                                              | 4.4x10 <sup>4</sup>   | -1.4  |
| Zn(II)  | Zn <sub>3</sub> (PO <sub>4</sub> ) <sub>2</sub>                                                  | 2.2                   | -5.7  |
|         | Zn(OH) <sub>2</sub>                                                                              | 6.9x10 <sup>4</sup>   | -1.2  |
| Cr(III) | Cr <sub>2</sub> O <sub>3</sub>                                                                   | 2.7x10 <sup>-3</sup>  | -8.6  |
|         | Cr(OH) <sub>3</sub> [Am]                                                                         | 1.1x10 <sup>-2</sup>  | -8.0  |
|         | Cr(OH) <sub>3</sub>                                                                              | 8.2x10 <sup>-1</sup>  | -6.1  |

|         |                                                                                       |                       |       |
|---------|---------------------------------------------------------------------------------------|-----------------------|-------|
| Cr(VI)  | CrO <sub>3</sub>                                                                      | 4.2x10 <sup>29</sup>  | 23.6  |
| Co(II)  | Co <sub>3</sub> (PO <sub>4</sub> ) <sub>2</sub>                                       | 2.1                   | -5.7  |
|         | CoHPO <sub>4</sub>                                                                    | 2.5x10 <sup>2</sup>   | -3.6  |
|         | CoO                                                                                   | 1.2x10 <sup>5</sup>   | -0.9  |
|         | Co(OH) <sub>2</sub>                                                                   | 1.6x10 <sup>5</sup>   | -0.8  |
| Co(III) | Co(OH) <sub>3</sub>                                                                   | 3.4x10 <sup>-13</sup> | -18.5 |
| V(III)  | V <sub>2</sub> O <sub>3</sub>                                                         | 1.8x10 <sup>7</sup>   | 1.3   |
|         | V(OH) <sub>3</sub>                                                                    | 3.2x10 <sup>10</sup>  | 4.5   |
| Al(III) | Diaspore (AlO(OH))                                                                    | 1.6x10 <sup>-2</sup>  | -7.8  |
|         | Gibbsite (γ- Al(OH) <sub>3</sub> )                                                    | 4.7x10 <sup>-1</sup>  | -6.3  |
|         | Boehmite (AlO(OH))                                                                    | 6.4x10 <sup>-1</sup>  | -6.2  |
|         | Al <sub>2</sub> O <sub>3</sub>                                                        | 9.5                   | -5.0  |
|         | Al(OH) <sub>3</sub> [Am]                                                              | 1.2x10 <sup>2</sup>   | -3.9  |
| Ca(II)  | Hydroxylapatite (Ca <sub>10</sub> (PO <sub>4</sub> ) <sub>6</sub> (OH) <sub>2</sub> ) | 6.6                   | -5.2  |
|         | Ca <sub>3</sub> (PO <sub>4</sub> ) <sub>2</sub>                                       | 1.2x10 <sup>2</sup>   | -3.9  |
|         | CaHPO <sub>4</sub>                                                                    | 1.3x10 <sup>2</sup>   | -3.9  |
|         | Ca <sub>4</sub> H(PO <sub>4</sub> ) <sub>3</sub> :3H <sub>2</sub> O                   | 1.7x10 <sup>2</sup>   | -3.8  |
|         | CaHPO <sub>4</sub> :2H <sub>2</sub> O                                                 | 2.2x10 <sup>2</sup>   | -3.7  |

|         |                                                                                        |                      |      |
|---------|----------------------------------------------------------------------------------------|----------------------|------|
|         | Calcite (metastable $\text{Ca}(\text{CO}_3)$ )                                         | $7.1 \times 10^3$    | -2.1 |
|         | Aragonite ( $\text{CaCO}_3$ )                                                          | $8.5 \times 10^3$    | -2.1 |
|         | Portlandite (metastable $\text{Ca}(\text{OH})_2$ )                                     | $4.9 \times 10^{13}$ | 7.7  |
|         | Lime ( $\text{Ca}(\text{OH})_2$ )                                                      | $1.4 \times 10^{23}$ | 17.1 |
| Mg(II)  | $\text{MgHPO}_4 \cdot 3\text{H}_2\text{O}$                                             | $1.2 \times 10^3$    | -2.9 |
|         | $\text{Mg}_3(\text{PO}_4)_2$                                                           | $8.4 \times 10^3$    | -2.1 |
|         | Magnesite ( $\text{MgCO}_3$ )                                                          | $2.9 \times 10^4$    | -1.5 |
|         | Hydromagnesite ( $\text{Mg}_5(\text{CO}_3)_4(\text{OH})_2 \cdot 4\text{H}_2\text{O}$ ) | $1.5 \times 10^5$    | -0.8 |
|         | Nesquehonite ( $\text{MgHCO}_3(\text{OH}) \cdot 2\text{H}_2\text{O}$ )                 | $4.4 \times 10^5$    | -0.4 |
|         | Artinite ( $\text{Mg}_2(\text{OH})_2 \cdot 3\text{H}_2\text{O}$ )                      | $5.3 \times 10^5$    | -0.3 |
|         | Brucite ( $\text{Mg}(\text{OH})_2$ )                                                   | $6.8 \times 10^7$    | 1.8  |
|         | $\text{Mg}(\text{OH})_2$                                                               | $3.6 \times 10^{10}$ | 4.6  |
|         | Periclase ( $\text{MgO}$ )                                                             | $2.1 \times 10^{12}$ | 6.3  |
| Mo(III) | $\text{H}_2\text{MoO}_4$                                                               | $8.0 \times 10^{19}$ | 13.9 |
|         | $\text{MoO}_3$                                                                         | $5.2 \times 10^{51}$ | 45.7 |
| Pb(II)  | $\text{Pb}_3(\text{PO}_4)_2$                                                           | $3.5 \times 10^{-4}$ | -9.5 |
|         | Hydroxylpyromorphite ( $\text{Pb}_5(\text{PO}_4)_3(\text{OH})$ )                       | $3.8 \times 10^{-4}$ | -9.4 |
|         | $\text{PbHPO}_4$                                                                       | $6.6 \times 10^{-4}$ | -9.2 |

|                                                                                     |                      |      |
|-------------------------------------------------------------------------------------|----------------------|------|
| Pb(OH) <sub>2</sub>                                                                 | 4.5x10 <sup>-1</sup> | -6.3 |
| Hydrocerrusite (Pb <sub>3</sub> (CO <sub>3</sub> ) <sub>2</sub> (OH) <sub>2</sub> ) | 1.4                  | -5.9 |
| Cerrusite (PbCO <sub>3</sub> )                                                      | 5.5                  | -5.3 |
| Pb <sub>2</sub> OCO <sub>3</sub>                                                    | 2.0x10 <sup>2</sup>  | -3.7 |
| Pb <sub>3</sub> O <sub>2</sub> CO <sub>3</sub>                                      | 4.6x10 <sup>2</sup>  | -3.3 |
| Pb <sub>10</sub> (OH) <sub>6</sub> O(CO <sub>3</sub> ) <sub>6</sub>                 | 2.2x10 <sup>4</sup>  | -1.7 |
| Litharge (α -PbO)                                                                   | 7.0x10 <sup>8</sup>  | 2.8  |
| Massicot (β -PbO)                                                                   | 4.1x10 <sup>9</sup>  | 3.6  |
| PbO:O.3H <sub>2</sub> O                                                             | 5.8x10 <sup>11</sup> | 5.8  |
| Pb <sub>2</sub> O(OH) <sub>2</sub>                                                  | 1.7x10 <sup>12</sup> | 6.2  |

**Table S9.** Saturation index of various precipitates for each metal in SRM1648a samples 1, 2 and 3 under assay conditions (0.1M PO<sub>4</sub>, ionic strength=0.22, 37C).

| Metal   | Solid                                                                          | Sample 1 | Sample 2 | Sample 3 |
|---------|--------------------------------------------------------------------------------|----------|----------|----------|
| Cu(I)   | Cuprite (Cu <sub>2</sub> O)                                                    | 2.8      | 3.7      | 4.6      |
| Cu(II)  | Cu <sub>3</sub> (PO <sub>4</sub> ) <sub>2</sub>                                | -5.0     | -3.5     | -2.2     |
|         | Tenorite (CuO)                                                                 | -2.0     | -1.5     | -1.1     |
|         | Cu <sub>3</sub> (PO <sub>4</sub> ) <sub>2</sub> ·3H <sub>2</sub> O             | -6.7     | -5.3     | -4.0     |
|         | Cu(OH) <sub>2</sub>                                                            | -3.1     | -2.6     | -2.2     |
| Fe(II)  | Fe <sub>3</sub> (PO <sub>4</sub> ) <sub>2</sub>                                | -4.4     | -2.9     | -1.8     |
|         | Vivianite (Fe <sub>3</sub> (PO <sub>4</sub> ) <sub>2</sub> ·8H <sub>2</sub> O) | -4.4     | -2.9     | -1.8     |
|         | Wusite (FeO)                                                                   | -4.8     | -4.4     | -4.0     |
|         | Fe(OH) <sub>2</sub>                                                            | -7.9     | -7.4     | -7.0     |
| Fe(III) | Hematite (Fe <sub>2</sub> O <sub>3</sub> )                                     | 14.0     | 15.0     | 16.0     |
|         | Goethite (α- FeO(OH))                                                          | 5.8      | 6.3      | 6.7      |
|         | Lepidocrocite (γ - FeO(OH))                                                    | 4.5      | 5.0      | 5.5      |
|         | Strengite (FePO <sub>4</sub> ·2H <sub>2</sub> O)                               | 3.6      | 4.1      | 4.6      |
|         | Ferrihydrite (Fe <sub>2</sub> O <sub>3</sub> ·0.5H <sub>2</sub> O)             | 3.2      | 3.7      | 4.1      |
|         | Maghemite (γ - Fe <sub>2</sub> O <sub>3</sub> )                                | 5.4      | 6.4      | 7.3      |



|         |                                                                                                  |       |       |       |
|---------|--------------------------------------------------------------------------------------------------|-------|-------|-------|
| Mn(II)  | MnHPO <sub>4</sub>                                                                               | 2.6   | 3.2   | 3.7   |
|         | Mn <sub>3</sub> (PO <sub>4</sub> ) <sub>2</sub>                                                  | -16.0 | -14.2 | -12.7 |
|         | Pyrochroite (Mn(OH) <sub>2</sub> )                                                               | -8.6  | -8.0  | -7.6  |
|         | Hausmannite ((Mn <sup>2+</sup> Mn <sup>3+</sup> ) <sub>2</sub> O <sub>4</sub> )                  | 9.9   | 10.2  | 10.5  |
| Mn(III) | Manganite (MnO(OH))                                                                              | 3.0   | 4.6   | 5.8   |
|         | Bixbyite ((Mn, Fe) <sub>2</sub> O <sub>3</sub> )                                                 | 2.3   | 2.8   | 3.2   |
| Mn(IV)  | Pyrolusite (MnO <sub>2</sub> )                                                                   | 7.6   | 8.5   | 9.3   |
|         | Nsutite (Mn <sup>4+</sup> Mn <sup>2+</sup> O(OH) <sub>2</sub> )                                  | 7.3   | 7.7   | 7.9   |
|         | Birnessite ((Mn <sup>4+</sup> Mn <sup>3+</sup> ) <sub>2</sub> O <sub>2</sub> .5H <sub>2</sub> O) | 6.7   | 7.1   | 7.3   |
| Ni(II)  | Ni <sub>3</sub> (PO <sub>4</sub> ) <sub>2</sub>                                                  | -8.7  | -7.2  | -5.7  |
|         | Bunsenite (NiO)                                                                                  | -6.0  | -5.4  | -5.0  |
|         | Ni(OH) <sub>2</sub>                                                                              | -6.3  | -5.8  | -5.3  |
| Zn(II)  | Zn <sub>3</sub> (PO <sub>4</sub> ) <sub>2</sub>                                                  | -1.5  | 0.1   | 1.5   |
|         | Zn(OH) <sub>2</sub>                                                                              | -5.4  | -4.8  | -4.4  |
| Cr(III) | Cr <sub>2</sub> O <sub>3</sub>                                                                   | 3.1   | 3.7   | 4.5   |
|         | Cr(OH) <sub>3</sub> [Am]                                                                         | 1.0   | 1.3   | 1.7   |
|         | Cr(OH) <sub>3</sub>                                                                              | -0.9  | -0.6  | -0.2  |
| Cr(VI)  | CrO <sub>3</sub>                                                                                 | -19.1 | -18.8 | -16.4 |

|         |                                                                                       |       |       |       |
|---------|---------------------------------------------------------------------------------------|-------|-------|-------|
| Co(II)  | Co <sub>3</sub> (PO <sub>4</sub> ) <sub>2</sub>                                       | -5.5  | -4.0  | -3.1  |
|         | CoHPO <sub>4</sub>                                                                    | -3.9  | -3.4  | -3.1  |
|         | CoO                                                                                   | -7.1  | -6.6  | -6.3  |
|         | Co(OH) <sub>2</sub>                                                                   | -7.4  | -6.8  | -6.5  |
| Co(III) | Co(OH) <sub>3</sub>                                                                   | 11.0  | 11.5  | 11.8  |
| V(III)  | V <sub>2</sub> O <sub>3</sub>                                                         | -8.7  | -8.3  | -7.8  |
|         | V(OH) <sub>3</sub>                                                                    | -11.9 | -11.5 | -11.0 |
| Al(III) | Diaspore (AlO(OH))                                                                    | 2.2   | 2.7   | 3.1   |
|         | Gibbsite (γ- Al(OH) <sub>3</sub> )                                                    | 0.7   | 1.2   | 1.6   |
|         | Boehmite (AlO(OH))                                                                    | 0.6   | 1.0   | 1.5   |
|         | Al <sub>2</sub> O <sub>3</sub>                                                        | -1.2  | -0.2  | 0.7   |
|         | Al(OH) <sub>3</sub> [Am]                                                              | -1.7  | -1.2  | -0.8  |
| Ca(II)  | Hydroxylapatite (Ca <sub>10</sub> (PO <sub>4</sub> ) <sub>6</sub> (OH) <sub>2</sub> ) | 0.9   | 3.3   | 5.6   |
|         | Ca <sub>3</sub> (PO <sub>4</sub> ) <sub>2</sub>                                       | -3.3  | -1.8  | -0.4  |
|         | CaHPO <sub>4</sub>                                                                    | -1.1  | -0.6  | -0.2  |
|         | Ca <sub>4</sub> H(PO <sub>4</sub> ) <sub>3</sub> ·3H <sub>2</sub> O                   | -4.9  | -3.0  | -1.1  |
|         | CaHPO <sub>4</sub> ·2H <sub>2</sub> O                                                 | -1.3  | -0.9  | -0.4  |
|         | Calcite (metastable Ca(CO <sub>3</sub> ))                                             | -4.6  | -4.1  | -3.6  |

|        |                                                                                                       |       |       |       |
|--------|-------------------------------------------------------------------------------------------------------|-------|-------|-------|
|        | Aragonite (CaCO <sub>3</sub> )                                                                        | -4.7  | -4.2  | -3.8  |
|        | Portlandite (metastable Ca(OH) <sub>2</sub> )                                                         | -13.4 | -12.9 | -12.5 |
|        | Lime (Ca(OH) <sub>2</sub> )                                                                           | -22.9 | -22.4 | -21.9 |
| Mg(II) | MgHPO <sub>4</sub> ·3H <sub>2</sub> O                                                                 | -2.6  | -2.1  | -1.6  |
|        | Mg <sub>3</sub> (PO <sub>4</sub> ) <sub>2</sub>                                                       | -10.3 | -8.8  | -7.4  |
|        | Magnesite (MgCO <sub>3</sub> )                                                                        | -6.4  | -5.9  | -5.4  |
|        | Hydromagnesite (Mg <sub>5</sub> (CO <sub>3</sub> ) <sub>4</sub> (OH) <sub>2</sub> ·4H <sub>2</sub> O) | -36.5 | -34.1 | -31.8 |
|        | Nesquehonite (MgHCO <sub>3</sub> (OH)·2H <sub>2</sub> O)                                              | -8.9  | -8.4  | -7.9  |
|        | Artinite (Mg <sub>2</sub> (OH) <sub>2</sub> ·3H <sub>2</sub> O)                                       | -14.5 | -13.5 | -12.6 |
|        | Brucite (Mg(OH) <sub>2</sub> )                                                                        | -8.1  | -7.6  | -7.2  |
|        | Mg(OH) <sub>2</sub>                                                                                   | -10.8 | -10.3 | -9.9  |
|        | Periclase (MgO)                                                                                       | -12.6 | -12.1 | -11.7 |
| Pb(II) | Pb <sub>3</sub> (PO <sub>4</sub> ) <sub>2</sub>                                                       | 9.2   | 10.8  | 12.2  |
|        | Hydroxylpyromorphite (Pb <sub>5</sub> (PO <sub>4</sub> ) <sub>3</sub> (OH))                           | 15.1  | 17.9  | 20.1  |
|        | PbHPO <sub>4</sub>                                                                                    | 2.8   | 3.3   | 3.8   |
|        | Pb(OH) <sub>2</sub>                                                                                   | -0.1  | 0.5   | 0.9   |
|        | Hydrocerrusite (Pb <sub>3</sub> (CO <sub>3</sub> ) <sub>2</sub> (OH) <sub>2</sub> )                   | -1.4  | 0.2   | 1.6   |
|        | Cerrusite (PbCO <sub>3</sub> )                                                                        | -1.0  | -0.4  | 0.0   |

|                                                                     |       |       |       |
|---------------------------------------------------------------------|-------|-------|-------|
| Pb <sub>2</sub> OCO <sub>3</sub>                                    | -5.4  | -4.3  | -3.4  |
| Pb <sub>3</sub> O <sub>2</sub> CO <sub>3</sub>                      | -8.8  | -7.2  | -5.8  |
| Pb <sub>10</sub> (OH) <sub>6</sub> O(CO <sub>3</sub> ) <sub>6</sub> | -44.1 | -38.7 | -34.2 |
| Litharge (α -PbO)                                                   | -4.6  | -4.0  | -3.6  |
| Massicot (β -PbO)                                                   | -4.7  | -4.2  | -3.7  |
| PbO:0.3H <sub>2</sub> O                                             | -5.3  | -4.7  | -4.3  |
| Pb <sub>2</sub> O(OH) <sub>2</sub>                                  | -10.8 | -9.7  | -8.8  |
